# Supplementary material for: A Scientometric Review of Rasch Measurement: The Rise and Progress of a Specialty
Source: PubMed Central journal article supplement (PMC6817464; doi:10.3389/fpsyg.2019.02197), 2019-10-22
Supplement: Data_Sheet_1.pdf [file Data_Sheet_1.pdf]

# A Scientometric Review of Rasch Measurement: The Rise and Progress of a Specialty

Vahid Aryadoust <sup>1\*</sup>, Hannah Ann Hui Tan<sup>2</sup> and Li Ying Ng<sup>1</sup>

<sup>1</sup> National Institute of Education, Nanyang Technological University, Singapore, Singapore, <sup>2</sup> School of Social Sciences - Psychology, Nanyang Technological University, Singapore, Singapore

## Citation:

Aryadoust, V., Tan, H.A.H., & Ng L.Y. (2019). A Scientometric review of Rasch measurement: The rise and progress of a specialty. *Frontiers in Psychology*. 10:2197. doi: 10.3389/fpsyg.2019.02197

## Appendix 1 Author co-citation analysis (ACA)

| Cited Authors       | Strength | Begin | End  | Span |
|---------------------|----------|-------|------|------|
| RASCH G             | 5.4145   | 1976  | 1987 | 11   |
| LORD FM             | 31.2723  | 1977  | 2004 | 27   |
| WRIGHT BD           | 7.683    | 1977  | 1989 | 12   |
| HAMBLETON RK        | 6.1043   | 1978  | 1983 | 5    |
| WHITELY SE          | 4.8999   | 1978  | 1997 | 19   |
| GUSTAFSSON JE       | 24.8724  | 1979  | 2001 | 22   |
| MELLENBERGH GJ      | 6.0442   | 1981  | 1998 | 17   |
| HABERMAN SJ         | 13.3056  | 1981  | 1998 | 17   |
| SAMEJIMA F          | 29.5008  | 1982  | 2006 | 24   |
| FORMANN AK          | 8.3337   | 1983  | 1999 | 16   |
| BOCK RD             | 32.2103  | 1983  | 2007 | 24   |
| YEN WM              | 7.4321   | 1986  | 2007 | 21   |
| MOLENAAR IW         | 30.1958  | 1986  | 2005 | 19   |
| DIVGI DR            | 5.5671   | 1986  | 2002 | 16   |
| ROSKAM EE           | 6.5896   | 1988  | 1999 | 11   |
| MISLEVY RJ          | 24.9837  | 1988  | 2007 | 19   |
| JANSEN PGW          | 6.3383   | 1988  | 1996 | 8    |
| KELDERMAN H         | 32.5274  | 1988  | 2005 | 17   |
| BISHOP YM           | 8.8755   | 1988  | 1996 | 8    |
| VANDENWOLLENBERG AL | 10.32    | 1988  | 2001 | 13   |
| DEMPSTER AP         | 7.3827   | 1990  | 2006 | 16   |
| GUTTMAN L           | 19.2308  | 1990  | 2007 | 17   |
| ROSENBAUM PR        | 10.7626  | 1990  | 2005 | 15   |
| GLAS CAW            | 24.1748  | 1990  | 2007 | 17   |
| MOKKEN RJ           | 10.7626  | 1990  | 2005 | 15   |
| LAZARSELD PF        | 8.8039   | 1990  | 2005 | 15   |

| Cited Authors | Strength | Begin | End  | Span |
|---------------|----------|-------|------|------|
| LEHMANN EL    | 4.8998   | 1991  | 2003 | 12   |
| GOODMAN LA    | 7.8502   | 1991  | 1999 | 8    |
| KLAUER KC     | 7.079    | 1991  | 2003 | 12   |
| CHOPPIN B     | 4.4694   | 1991  | 1996 | 5    |
| DUNCAN OD     | 9.176    | 1991  | 1995 | 4    |
| CLOGG CC      | 6.7746   | 1991  | 1998 | 7    |
| CRESSIE N     | 8.0066   | 1991  | 1994 | 3    |
| TJUR T        | 10.0266  | 1991  | 1997 | 6    |
| AGRESTI A     | 16.0409  | 1992  | 2000 | 8    |
| JANNARONE RJ  | 7.2044   | 1993  | 2003 | 10   |
| FISHER AG     | 14.1181  | 1993  | 1999 | 6    |
| FOLLMANN D    | 4.3777   | 1993  | 1998 | 5    |
| LUNZ ME       | 13.2691  | 1993  | 2006 | 13   |
| HULIN CL      | 7.0506   | 1993  | 2001 | 8    |
| SILVERSTEIN B | 17.1957  | 1993  | 2003 | 10   |
| LINDSAY B     | 11.1675  | 1993  | 2001 | 8    |
| DELEEuw J     | 5.6291   | 1993  | 1998 | 5    |
| GRANGER CV    | 19.9744  | 1993  | 2003 | 10   |
| RAMSAY JO     | 6.1342   | 1993  | 1999 | 6    |
| VERHELST ND   | 20.655   | 1993  | 2007 | 14   |
| HEINEMANN AW  | 14.6612  | 1993  | 2002 | 9    |
| MCCULLAGH P   | 4.4323   | 1993  | 2003 | 10   |
| DRASGOW F     | 11.0877  | 1993  | 2003 | 10   |
| HOIJTINK H    | 15.291   | 1994  | 2005 | 11   |
| MURAKI E      | 22.8866  | 1994  | 2007 | 13   |
| TATSUOKA KK   | 4.2288   | 1995  | 2001 | 6    |
| MCARTHUR DL   | 5.2221   | 1995  | 1997 | 2    |
| SIJTSMA K     | 5.4376   | 1995  | 2001 | 6    |
| MAHONEY FI    | 6.1136   | 1995  | 2008 | 13   |
| RECKASE MD    | 6.6466   | 1995  | 2001 | 6    |
| HATTIE J      | 5.418    | 1996  | 2002 | 6    |
| ZHU WM        | 4.3118   | 1996  | 2001 | 5    |
| HAMILTON BB   | 4.5777   | 1996  | 1998 | 2    |
| JETTE AM      | 4.8157   | 1996  | 2002 | 6    |
| *SAS I        | 5.2966   | 1996  | 2005 | 9    |
| GRIMBY G      | 10.051   | 1996  | 2004 | 8    |
| FRIES JF      | 6.1401   | 1996  | 2004 | 8    |
| STUCKI G      | 11.3091  | 1997  | 2009 | 12   |
| MCDONALD RP   | 13.1225  | 1997  | 2005 | 8    |
| BERGNER M     | 8.3931   | 1997  | 2003 | 6    |
| ANDERSEN EB   | 10.5197  | 1998  | 2002 | 4    |
| FISCHER GH    | 15.771   | 1998  | 2004 | 6    |
| ROST J        | 15.3905  | 1998  | 2006 | 8    |
| GELMAN A      | 9.1748   | 1998  | 2003 | 5    |
| ANGOFF WH     | 10.0569  | 1998  | 2005 | 7    |

| Cited Authors                         | Strength | Begin | End  | Span |
|---------------------------------------|----------|-------|------|------|
| PATZ RJ                               | 11.4501  | 1999  | 2007 | 8    |
| MCDOWELL I                            | 5.8817   | 2000  | 2002 | 2    |
| EFRON B                               | 8.72     | 2000  | 2005 | 5    |
| PATRICK DL                            | 6.9765   | 2000  | 2003 | 3    |
| SHROUT PE                             | 5.0793   | 2001  | 2006 | 5    |
| PRIETO L                              | 9.109    | 2002  | 2005 | 3    |
| VAN DER L                             | 9.1301   | 2002  | 2006 | 4    |
| MEIJER RR                             | 8.3293   | 2002  | 2005 | 3    |
| MCHORNEY CA                           | 19.5839  | 2002  | 2009 | 7    |
| RACZEK AE                             | 5.7202   | 2002  | 2004 | 2    |
| ADAMS RJ                              | 9.8462   | 2002  | 2006 | 4    |
| WOLFE F                               | 13.4246  | 2002  | 2008 | 6    |
| WU ML                                 | 18.9951  | 2002  | 2006 | 4    |
| WRIGHT B                              | 7.9454   | 2003  | 2008 | 5    |
| MICHELL J                             | 9.3      | 2003  | 2006 | 3    |
| VELOZO CA                             | 29.2273  | 2004  | 2009 | 5    |
| HAYS RD                               | 11.3137  | 2004  | 2012 | 8    |
| MASSOF RW                             | 21.209   | 2004  | 2013 | 9    |
| LAI JS                                | 13.1848  | 2005  | 2009 | 4    |
| TESIO L                               | 13.9526  | 2005  | 2013 | 8    |
| THISSEN D                             | 9.28     | 2005  | 2011 | 6    |
| MERBITZ C                             | 8.2863   | 2006  | 2008 | 2    |
| FOLSTEIN MF                           | 15.5944  | 2007  | 2012 | 5    |
| DE BP                                 | 10.3586  | 2007  | 2011 | 4    |
| PESUDOV K                             | 14.8978  | 2007  | 2012 | 5    |
| SMITH RM                              | 8.0182   | 2008  | 2009 | 1    |
| SMITH E                               | 6.9747   | 2008  | 2010 | 2    |
| KARABATSOS G                          | 12.4787  | 2008  | 2009 | 1    |
| DUNCAN PW                             | 11.4908  | 2008  | 2010 | 2    |
| LAMOUREUX EL                          | 31.5968  | 2008  | 2013 | 5    |
| MALLINSON T                           | 19.2678  | 2009  | 2011 | 2    |
| LUCE RD                               | 12.4377  | 2009  | 2013 | 4    |
| LORD F                                | 12.3599  | 2009  | 2011 | 2    |
| CONRAD KJ                             | 11.7285  | 2010  | 2013 | 3    |
| WAINER H                              | 8.8562   | 2010  | 2012 | 2    |
| LUNDSTROM M                           | 12.7509  | 2010  | 2011 | 1    |
| BAKER FB                              | 10.4419  | 2010  | 2012 | 2    |
| HALEY SM                              | 4.1974   | 2010  | 2011 | 1    |
| BIRNBAUM A                            | 6.0967   | 2010  | 2011 | 1    |
| MANGIONE CM                           | 12.6597  | 2011  | 2012 | 1    |
| PALLANT JF                            | 18.1432  | 2012  | 2015 | 3    |
| **AMERICAN PSYCHIATRIC<br>ASSOCIATION | 13.6993  | 2012  | 2014 | 2    |
| WANG WC                               | 27.9064  | 2012  | 2016 | 4    |
| HAGQUIST C                            | 30.5041  | 2012  | 2019 | 7    |

| Cited Authors  | Strength | Begin | End  | Span |
|----------------|----------|-------|------|------|
| HOBART J       | 28.1438  | 2012  | 2019 | 7    |
| HU LT          | 31.2241  | 2013  | 2019 | 6    |
| HOBART JC      | 23.8062  | 2013  | 2015 | 2    |
| REEVE BB       | 13.3597  | 2013  | 2015 | 2    |
| [ANONYMOUS]    | 33.3255  | 2013  | 2019 | 6    |
| MARAIS IDA     | 14.0817  | 2014  | 2015 | 1    |
| REISE SP       | 5.3903   | 2014  | 2015 | 1    |
| LINCARE MJ     | 31.7059  | 2014  | 2019 | 5    |
| MESSICK S      | 30.2655  | 2014  | 2019 | 5    |
| BEATON DE      | 12.6599  | 2014  | 2015 | 1    |
| MUTHEN LK      | 21.8076  | 2015  | 2017 | 2    |
| WOLFE EW       | 11.112   | 2015  | 2019 | 4    |
| COHEN J        | 7.4084   | 2015  | 2016 | 1    |
| R CT           | 26.2344  | 2015  | 2019 | 4    |
| SMITH AB       | 6.558    | 2015  | 2016 | 1    |
| DEVELLIS RF    | 15.6989  | 2016  | 2019 | 3    |
| BOONE WJ       | 43.9175  | 2016  | 2019 | 3    |
| GOTHWAL VK     | 6.2344   | 2016  | 2017 | 1    |
| DE AYALA R     | 10.2676  | 2016  | 2019 | 3    |
| KHADKA J       | 26.1945  | 2016  | 2019 | 3    |
| CHRISTENSEN KB | 30.9013  | 2016  | 2019 | 3    |
| ENGELHARD G    | 42.3541  | 2016  | 2019 | 3    |
| FISHERWP       | 21.3046  | 2017  | 2019 | 2    |
| TERWEE CB      | 20.0977  | 2017  | 2019 | 2    |
| MOKKINK LB     | 24.6906  | 2017  | 2019 | 2    |
| ECKES T        | 12.33    | 2017  | 2019 | 2    |

**Appendix 2**  
**Document co-citation analysis (DCA)**

| References (DCA)                                                           | Year | Strength | Begin | End  | Span |
|----------------------------------------------------------------------------|------|----------|-------|------|------|
| BOND TG, 2007, APPL RASCH MODEL FUN                                        | 2007 | 133.0131 | 2010  | 2015 | 5    |
| BOND TG, 2001, APPL RASCH MODEL FUN                                        | 2001 | 88.1181  | 2003  | 2009 | 6    |
| <u>TENNANT A, 2007, ARTHRIT RHEUM-ARTHR, V57, P1358</u>                    | 2007 | 83.7317  | 2011  | 2015 | 4    |
| BOND TG, 2015, APPL RASCH MODEL FUN                                        | 2015 | 57.9267  | 2016  | 2019 | 3    |
| <u>PALLANT JF, 2007, BRIT J CLIN PSYCHOL, V46, P1</u>                      | 2007 | 52.4344  | 2009  | 2015 | 6    |
| SMITH E, 2002, J APPL MEAS, V3, P205                                       | 2002 | 49.3961  | 2006  | 2010 | 4    |
| EMBRETSON SE, 2000, ITEM RESPONSE THEORY                                   | 2000 | 33.1571  | 2003  | 2008 | 5    |
| <u>HAGQUIST C, 2009, INT J NURS STUD, V46, P380, DOI</u>                   | 2009 | 32.1003  | 2012  | 2017 | 5    |
| ENGELHARD G, 2013, INVARIANT MEASUREMENT: USING RASCH MODELS IN THE SOCIAL | 2013 | 30.8451  | 2016  | 2019 | 3    |
| LINACRE JM, 2002, J APPL MEAS, V3, P85                                     | 2002 | 28.0657  | 2006  | 2010 | 4    |
| <u>HOBART J, 2009, HEALTH TECHNOL ASSES, V13, P1, DOI</u>                  | 2009 | 27.8369  | 2012  | 2017 | 5    |
| TENNANT A, 2006, RASCH MEAS T, V20, P1048                                  | 2006 | 27.8189  | 2008  | 2014 | 6    |
| <u>TENNANT A, 2004, VALUE HEALTH, V7, P0, DOI</u>                          | 2004 | 27.3566  | 2006  | 2012 | 6    |
| BOONE WJ, 2014, RASCH ANAL HUMAN SCI                                       | 2014 | 26.274   | 2016  | 2019 | 3    |
| **WORLDHEALTHORGANIZATION, 2001, INT CLASS FUNCT DIS                       | 2001 | 25.7576  | 2004  | 2009 | 5    |
| <u>TESIO L, 2003, J REHABIL MED, V35, P105, DOI</u>                        | 2003 | 25.2808  | 2005  | 2011 | 6    |

| References (DCA)                                                 | Year | Strength | Begin | End  | Span |
|------------------------------------------------------------------|------|----------|-------|------|------|
| BOND TG, 2001, APPLYING RASCH MODEL                              | 2001 | 24.8066  | 2004  | 2009 | 5    |
| <u>PESUDOVS K, 2007, OPTOMETRY VISION SCI, V84, P663, DOI</u>    | 2007 | 23.5194  | 2009  | 2015 | 6    |
| WILSON M, 2005, CONSTRUCTING MEASURE                             | 2005 | 21.3896  | 2007  | 2013 | 6    |
| <u>PESUDOVS K, 2004, OPTOMETRY VISION SCI, V81, P769, DOI</u>    | 2004 | 21.2727  | 2005  | 2011 | 6    |
| <u>PESUDOVS K, 2003, INVEST OPHTH VIS SCI, V44, P2892, DOI</u>   | 2003 | 21.0882  | 2004  | 2011 | 7    |
| <u>TENNANT A, 2004, MED CARE, V42, P37, DOI</u>                  | 2004 | 20.8859  | 2005  | 2012 | 7    |
| <u>SMITH AB, 2008, BMC MED RES METHODOL, V8, P0, DOI</u>         | 2008 | 20.5055  | 2011  | 2016 | 5    |
| <u>HOBART JC, 2007, LANCET NEUROL, V6, P1094, DOI</u>            | 2007 | 20.1648  | 2010  | 2015 | 5    |
| ANDRICH D, 2011, EXPERT REV PHARM OUT, V11, P571                 | 2011 | 19.9128  | 2013  | 2019 | 6    |
| STREINER DL, 2008, HLTH MEASUREMENT SCA                          | 2008 | 19.7225  | 2012  | 2016 | 4    |
| MARAIS IDA, 2008, J APPL MEAS, V9, P200                          | 2008 | 19.1957  | 2011  | 2015 | 4    |
| FISCHER GH, 1995, RASCH MODELS FDN REC                           | 1995 | 18.6486  | 1998  | 2003 | 5    |
| VAN DER L, 1997, HDB MODERN ITEM RESP                            | 1997 | 18.5703  | 1998  | 2005 | 7    |
| LINACRE JM, 1999, J OUTCOME MEAS, V3, P103                       | 1999 | 18.3245  | 2002  | 2007 | 5    |
| LINACRE JM, 2012, USERS GUIDE WINSTEPS                           | 2012 | 17.9953  | 2014  | 2019 | 5    |
| <u>LAMOUREUX EL, 2006, INVEST OPHTH VIS SCI, V47, P4732, DOI</u> | 2006 | 17.9028  | 2007  | 2012 | 5    |
| SMITH E, 2004, INTRO RASCH MEASUREM                              | 2004 | 17.3657  | 2006  | 2011 | 5    |
| <u>PESUDOVS K, 2006, BMC OPHTHALMOL, V6, P25, DOI</u>            | 2006 | 17.0428  | 2007  | 2012 | 5    |
| HAYS RD, 2000, MED CARE, V38, P28                                | 2000 | 16.831   | 2002  | 2007 | 5    |
| LINACRE JM, 2009, USERS GUIDE WINSTEPS                           | 2009 | 16.7212  | 2010  | 2017 | 7    |
| <u>MASSOF RW, 2002, OPTOMETRY VISION SCI, V79, P516, DOI</u>     | 2002 | 16.347   | 2005  | 2010 | 5    |
| DE AYALA R, 2009, THEORY PRACTICE ITEM                           | 2009 | 16.255   | 2014  | 2017 | 3    |
| <u>PETRILLO J, 2015, VALUE HEALTH, V18, P25, DOI</u>             | 2015 | 15.8476  | 2017  | 2019 | 2    |
| ANDRICH D, 2003, RUMM 2020                                       | 2003 | 15.8125  | 2006  | 2011 | 5    |
| ANDRICH D, 1988, RASCH MODELS MEASURE                            | 1988 | 15.5861  | 1991  | 1996 | 5    |
| <u>REEVE BB, 2007, MED CARE, V45, P0, DOI</u>                    | 2007 | 15.4042  | 2010  | 2015 | 5    |
| <u>MASSOF RW, 2001, VISION RES, V41, P397, DOI</u>               | 2001 | 15.0899  | 2003  | 2009 | 6    |
| <u>KHADKA J, 2013, OPTOMETRY VISION SCI, V90, P720, DOI</u>      | 2013 | 14.9077  | 2016  | 2019 | 3    |
| <u>DUNCAN PW, 2003, ARCH PHYS MED REHAB, V84, P950, DOI</u>      | 2003 | 14.7427  | 2005  | 2011 | 6    |
| SMITH E, 2001, J APPL MEAS, V2, P281                             | 2001 | 14.5993  | 2004  | 2009 | 5    |
| LINACRE JM, 2005, USERS GUIDE WINSTEPS                           | 2005 | 14.0175  | 2008  | 2011 | 3    |
| LINACRE JM, 2008, WINSTEPS RASCH MEASU                           | 2008 | 14.01    | 2009  | 2013 | 4    |
| LINCARE MJ, 2002, RASCH MEASUREMENT T, V16, P878                 | 2002 | 13.9214  | 2005  | 2010 | 5    |
| <u>MOKKINK LB, 2010, J CLIN EPIDEMIOL, V63, P737, DOI</u>        | 2010 | 13.901   | 2016  | 2019 | 3    |
| <u>TERWEE CB, 2007, J CLIN EPIDEMIOL, V60, P34, DOI</u>          | 2007 | 13.8813  | 2013  | 2015 | 2    |
| <u>KHADKA J, 2012, HEALTH QUAL LIFE OUT, V10, P0, DOI</u>        | 2012 | 13.8624  | 2016  | 2019 | 3    |
| LINACRE JM, 2011, USERS GUIDE WINSTEPS                           | 2011 | 13.7714  | 2013  | 2019 | 6    |
| <u>MOKKINK LB, 2010, QUAL LIFE RES, V19, P539, DOI</u>           | 2010 | 13.6575  | 2015  | 2019 | 4    |
| <u>ADAMS RJ, 1997, APPL PSYCH MEAS, V21, P1, DOI</u>             | 1997 | 13.5626  | 1999  | 2005 | 6    |
| <u>MCHORNEY CA, 1997, J CLIN EPIDEMIOL, V50, P451, DOI</u>       | 1997 | 13.5626  | 1999  | 2005 | 6    |
| <u>PESUDOVS K, 2010, J CATARACT REFR SURG, V36, P718, DOI</u>    | 2010 | 13.5176  | 2011  | 2016 | 5    |
| LINACRE JM, 1998, J OUTCOME MEAS, V2, P266                       | 1998 | 13.4198  | 2003  | 2006 | 3    |
| <u>CHEN WH, 2014, QUAL LIFE RES, V23, P485, DOI</u>              | 2014 | 13.1008  | 2015  | 2019 | 4    |
| <u>HALEY SM, 1994, J CLIN EPIDEMIOL, V47, P671, DOI</u>          | 1994 | 12.908   | 1996  | 2002 | 6    |
| <u>NILSSON AL, 2011, J REHABIL MED, V43, P884, DOI</u>           | 2011 | 12.4829  | 2013  | 2019 | 6    |
| <u>GARAMENDI E, 2006, VISION RES, V46, P1375, DOI</u>            | 2006 | 12.3915  | 2007  | 2011 | 4    |
| WOLFE EW, 2007, J APPL MEAS, V8, P204                            | 2007 | 12.3871  | 2011  | 2015 | 4    |
| <u>GOTHWAL VK, 2009, OPTOMETRY VISION SCI, V86, P836, DOI</u>    | 2009 | 12.1906  | 2010  | 2013 | 3    |
| MERBITZ C, 1989, ARCH PHYS MED REHAB, V70, P308                  | 1989 | 12.1736  | 1992  | 1997 | 5    |
| SMITH RM, 1998, J OUTCOME MEAS, V2, P66                          | 1998 | 12.062   | 2000  | 2006 | 6    |
| CHRISTENSEN KB, 2013, RASCH MODELS HLTH                          | 2013 | 11.9499  | 2016  | 2019 | 3    |
| MCHORNEY CA, 2000, MED CARE, V38, P43                            | 2000 | 11.8774  | 2002  | 2006 | 4    |
| <u>GRIMBY G, 2012, J REHABIL MED, V44, P97, DOI</u>              | 2012 | 11.8552  | 2015  | 2019 | 4    |
| LINACRE J, 2012, WINSTEPS RASCH MEASU                            | 2012 | 11.7448  | 2013  | 2019 | 6    |

| References (DCA)                                                                                                                          | Year | Strength | Begin | End  | Span |
|-------------------------------------------------------------------------------------------------------------------------------------------|------|----------|-------|------|------|
| <u>LAI JS, 2003, QUAL LIFE RES, V12, P485, DOI</u>                                                                                        | 2003 | 11.5904  | 2005  | 2009 | 4    |
| <u>CHANG CC, 2015, J CLIN EPIDEMIOL, V68, P674, DOI</u>                                                                                   | 2015 | 11.4286  | 2016  | 2019 | 3    |
| DE BP, 2004, EXPLANATORY ITEM RES                                                                                                         | 2004 | 11.305   | 2007  | 2012 | 5    |
| WRIGHT BD, 2000, J APPL MEAS, V1, P83                                                                                                     | 2000 | 11.2769  | 2003  | 2008 | 5    |
| <u>HAGQUIST C, 2004, PERS INDIV DIFFER, V36, P955, DOI</u>                                                                                | 2004 | 11.214   | 2007  | 2012 | 5    |
| FISHERWP, 2007, RASCH MEAS TRANS, V21, P1095                                                                                              | 2007 | 10.8967  | 2013  | 2015 | 2    |
| <u>ANDRICH D. 2012, J EDUC BEHAV STAT, V37, P387, DOI</u>                                                                                 | 2012 | 10.8338  | 2015  | 2019 | 4    |
| <u>GOTHWAL VK, 2009, OPTOMETRY VISION SCI, V86, P1160, DOI</u>                                                                            | 2009 | 10.8312  | 2010  | 2013 | 3    |
| SMITH RM, 2000, J APPL MEAS, V1, P199                                                                                                     | 2000 | 10.8053  | 2003  | 2008 | 5    |
| <u>LAMOUREUX EL, 2008, OPHTHAL EPIDEMIOL, V15, P224, DOI</u>                                                                              | 2008 | 10.6763  | 2009  | 2011 | 2    |
| <u>KHADKA J, 2011, INVEST OPHTH VIS SCI, V52, P6971, DOI</u>                                                                              | 2011 | 10.5539  | 2016  | 2019 | 3    |
| ANDRICH D, 2010, RASCH MODELS MEASURE                                                                                                     | 2010 | 10.5502  | 2016  | 2019 | 3    |
| <u>MURAKI E. 1992, APPL PSYCH MEAS, V16, P159, DOI</u>                                                                                    | 1992 | 10.524   | 1995  | 2000 | 5    |
| <u>HEINEMANN AW, 1993, ARCH PHYS MED REHAB, V74, P566, DOI</u>                                                                            | 1993 | 10.524   | 1995  | 2000 | 5    |
| <u>LAMOUREUX EL, 2007, INVEST OPHTH VIS SCI, V48, P1001, DOI</u>                                                                          | 2007 | 10.4751  | 2008  | 2014 | 6    |
| <u>DA RNS, 2013, J PSYCHIATR RES, V47, P141, DOI</u>                                                                                      | 2013 | 10.3065  | 2014  | 2019 | 5    |
| WRIGHT BD, 1989, ARCH PHYS MED REHAB, V70, P857                                                                                           | 1989 | 10.2467  | 1992  | 1997 | 5    |
| LINACRE JM, 2016, WINSTEPS RASCH MEASU                                                                                                    | 2016 | 10.172   | 2017  | 2019 | 2    |
| <u>ANDRICH D. 2004, MED CARE, V42, P7, DOI</u>                                                                                            | 2004 | 10.1361  | 2008  | 2012 | 4    |
| VELOZO CA, 2000, J OUTCOME MEAS, V4, P667                                                                                                 | 2000 | 10.0865  | 2004  | 2008 | 4    |
| BOND T, 2007, APPL RASCH MODEL                                                                                                            | 2007 | 10.0605  | 2012  | 2015 | 3    |
| <u>MALLINSON T, 2007, OPTOMETRY VISION SCI, V84, P675, DOI</u>                                                                            | 2007 | 10.0149  | 2009  | 2012 | 3    |
| <u>PATRICK DL, 2011, VALUE HEALTH, V14, P967, DOI</u>                                                                                     | 2011 | 9.9934   | 2016  | 2019 | 3    |
| LINACRE J, 2006, WINSTEPS RASCH MEASU                                                                                                     | 2006 | 9.9107   | 2007  | 2012 | 5    |
| <u>VELOZO CA, 1999, AM J OCCUP THER, V53, P83, DOI</u>                                                                                    | 1999 | 9.8793   | 2002  | 2007 | 5    |
| <u>DE BOER M, 2004, OPHTHAL PHYSI OPT, V24, P257, DOI</u>                                                                                 | 2004 | 9.8377   | 2006  | 2010 | 4    |
| <u>FISHER AG, 1993, AM J OCCUP THER, V47, P319, DOI</u>                                                                                   | 1993 | 9.7671   | 1994  | 2000 | 6    |
| <u>MALLINSON T, 2004, MED CARE, V42, P17, DOI</u>                                                                                         | 2004 | 9.6098   | 2009  | 2011 | 2    |
| <u>LUNDSTROM M, 2009, J CATARACT REFR SURG, V35, P504, DOI</u>                                                                            | 2009 | 9.5608   | 2009  | 2011 | 2    |
| HAMBLETON RK, 1991, FUNDAMENTALS ITEM RE                                                                                                  | 1991 | 9.5062   | 1995  | 1999 | 4    |
| <u>MASSOF RW, 2001, SURV OPHTHALMOL, V45, P531, DOI</u>                                                                                   | 2001 | 9.3916   | 2003  | 2008 | 5    |
| <u>SHEA TL, 2009, BMC PSYCHIATRY, V9, P0, DOI</u>                                                                                         | 2009 | 9.3701   | 2014  | 2017 | 3    |
| <u>PATRICK DL, 2011, VALUE HEALTH, V14, P978, DOI</u>                                                                                     | 2011 | 9.2548   | 2015  | 2019 | 4    |
| <u>LAMOUREUX E, 2011, AM J OPHTHALMOL, V151, P195, DOI</u>                                                                                | 2011 | 9.2438   | 2013  | 2019 | 6    |
| <u>PRIETO L, 2003, HEALTH QUAL LIFE OUTCOMES, V1, P27, DOI</u>                                                                            | 2003 | 9.2227   | 2007  | 2011 | 4    |
| MARAIS IDA, 2008, J APPL MEAS, V9, P105                                                                                                   | 2008 | 9.2013   | 2014  | 2016 | 2    |
| LINACRE JM, 2014, WINSTEPS RASCH MEASU                                                                                                    | 2014 | 9.1847   | 2014  | 2019 | 5    |
| LINACRE J, 2009, RASCH MEAS T, V23, P1228                                                                                                 | 2009 | 9.1471   | 2015  | 2017 | 2    |
| **AMERICANEDUCATIONRESEARCHASSOCIATIONAMERICANPSYCHOLOGICALASSOCIATION&NATIONALCOUNCILONMEASUREMENTINEDUCATION, 2014, STAND ED PSYCH TEST | 2014 | 9.039    | 2017  | 2019 | 2    |
| <u>ANDRICH D, 2015, EDUC PSYCHOL MEAS, V75, P185, DOI</u>                                                                                 | 2015 | 9.039    | 2017  | 2019 | 2    |
| LINACRE JM, 2016, USERS GUIDE WINSTEPS                                                                                                    | 2016 | 9.039    | 2017  | 2019 | 2    |
| <u>CAPPELLERI JC, 2014, CLIN THER, V36, P648, DOI</u>                                                                                     | 2014 | 9.039    | 2017  | 2019 | 2    |
| LINACRE JM, 1994, ARCH PHYS MED REHAB, V75, P127                                                                                          | 1994 | 8.871    | 1995  | 1999 | 4    |
| SILVERSTEIN B, 1992, ARCH PHYS MED REHAB, V73, P507                                                                                       | 1992 | 8.871    | 1995  | 1999 | 4    |
| <u>STUCKI G, 1996, J CLIN EPIDEMIOL, V49, P711, DOI</u>                                                                                   | 1996 | 8.7492   | 1999  | 2004 | 5    |
| DEVELLIS RF, 2012, SCALE DEV THEORY APP                                                                                                   | 2012 | 8.7105   | 2015  | 2016 | 1    |
| R CT, 2013, R LANG ENV STAT COMP                                                                                                          | 2013 | 8.5702   | 2015  | 2019 | 4    |
| LINACRE JM, 2006, USERS GUIDE WINSTEPS                                                                                                    | 2006 | 8.5367   | 2008  | 2014 | 6    |
| STREINER D, 2003, HLTH MEASUREMENT SCA                                                                                                    | 2003 | 8.4923   | 2006  | 2010 | 4    |
| <u>FORKMANN T, 2009, REHABIL PSYCHOL, V54, P186, DOI</u>                                                                                  | 2009 | 8.4437   | 2013  | 2014 | 1    |
| <u>BOONE WJ, 2011, SCI EDUC, V95, P258, DOI</u>                                                                                           | 2011 | 8.4305   | 2014  | 2017 | 3    |
| <u>PESUDOVS K, 2010, OPTOMETRY VISION SCI, V87, P285, DOI</u>                                                                             | 2010 | 8.2228   | 2011  | 2016 | 5    |

| References (DCA)                                                 | Year | Strength | Begin | End  | Span |
|------------------------------------------------------------------|------|----------|-------|------|------|
| <u>MANGIONE CM, 2001, ARCH OPHTHALMOL-CHIC, V119, P1050, DOI</u> | 2001 | 8.1752   | 2005  | 2008 | 3    |
| RAICHE G, 2005, RASCH MEASUREMENT T, V19, P1012                  | 2005 | 8.1466   | 2012  | 2013 | 1    |
| <u>LINDSAY B, 1991, J AM STAT ASSOC, V86, P96, DOI</u>           | 1991 | 8.0526   | 1993  | 1999 | 6    |
| <u>PATZ RJ, 1999, J EDUC BEHAV STAT, V24, P146, DOI</u>          | 1999 | 8.0104   | 2001  | 2007 | 6    |
| <u>LAMOUREUX EL, 2009, INVEST OPHTH VIS SCI, V50, P2607, DOI</u> | 2009 | 7.9882   | 2010  | 2011 | 1    |
| <u>BRODERSEN J, 2007, J MED ECON, V10, P309, DOI</u>             | 2007 | 7.9176   | 2013  | 2015 | 2    |
| <u>CHANG KC, 2014, HEALTH QUAL LIFE OUT, V12, P0, DOI</u>        | 2014 | 7.9067   | 2017  | 2019 | 2    |
| <u>BELVEDERE SL, 2010, J CLIN EPIDEMIOL, V63, P1287, DOI</u>     | 2010 | 7.8674   | 2012  | 2015 | 3    |
| ECKES T, 2011, INTRO MANY FACET RAS                              | 2011 | 7.8111   | 2014  | 2016 | 2    |
| <u>KHAN A, 2013, J CLIN EPIDEMIOL, V66, P681, DOI</u>            | 2013 | 7.8088   | 2017  | 2019 | 2    |
| KARABATSOS G, 2001, J APPL MEAS, V2, P389                        | 2001 | 7.7626   | 2006  | 2009 | 3    |
| LINACRE JM, 2009, WINSTEPS VERSION 3 6                           | 2009 | 7.6917   | 2010  | 2012 | 2    |
| <u>MCHORNEY CA, 1997, ANN INTERN MED, V127, P743, DOI</u>        | 1997 | 7.6532   | 1999  | 2004 | 5    |
| <u>SMITH AB, 2006, PSYCHO-ONCOLOGY, V15, P817, DOI</u>           | 2006 | 7.6529   | 2009  | 2012 | 3    |
| GLAS CAW, 1995, RASCH MODELS, V0, P69                            | 1995 | 7.6392   | 1999  | 2003 | 4    |
| LINACRE JM, 2005, WINSTEPS RASCH MEASU                           | 2005 | 7.5852   | 2007  | 2012 | 5    |
| <u>NORQUIST JM, 2004, MED CARE, V42, P25, DOI</u>                | 2004 | 7.4965   | 2010  | 2011 | 1    |
| WRIGHT BD, 1994, RASCH MEASUREMENT T, V8, P370                   | 1994 | 7.4643   | 1997  | 2001 | 4    |
| <u>PESUDOVS K, 2010, BRIT J OPHTHALMOL, V94, P777, DOI</u>       | 2010 | 7.4641   | 2011  | 2012 | 1    |
| <u>HATZINGER R, 2007, J STAT SOFTW, V20, P9, DOI</u>             | 2007 | 7.2371   | 2014  | 2015 | 1    |
| WAUGH RF, 2005, J APPL MEAS, V6, P80                             | 2005 | 7.2229   | 2007  | 2012 | 5    |
| <u>LUNDGREN-NILSSON A, 2005, J REHABIL MED, V37, P23, DOI</u>    | 2005 | 7.2195   | 2007  | 2010 | 3    |
| <u>WOLFE F, 1999, ANN RHEUM DIS, V58, P563, DOI</u>              | 1999 | 7.1954   | 2002  | 2004 | 2    |
| <u>SIEGERT RJ, 2010, DISABIL REHABIL, V32, P8, DOI</u>           | 2010 | 7.1042   | 2013  | 2019 | 6    |
| <u>RACZEK AE, 1998, J CLIN EPIDEMIOL, V51, P1203, DOI</u>        | 1998 | 6.8837   | 2002  | 2005 | 3    |
| <u>FLIEGE H, 2005, QUAL LIFE RES, V14, P2277, DOI</u>            | 2005 | 6.8423   | 2009  | 2010 | 1    |
| <u>CHANG WC, 1995, ARCH PHYS MED REHAB, V76, P934, DOI</u>       | 1995 | 6.8191   | 1997  | 2003 | 6    |
| <u>STELMACK JA, 2004, INVEST OPHTH VIS SCI, V45, P3919, DOI</u>  | 2004 | 6.7547   | 2006  | 2007 | 1    |
| <u>HU LT, 1999, STRUCT EQU MODELING, V6, P1, DOI</u>             | 1999 | 6.7547   | 2006  | 2007 | 1    |
| **AMERICANPSYCHIATRICASSOCIATION, 2013, DIAGN STAT MAN MENT      | 2013 | 6.6737   | 2014  | 2019 | 5    |
| <u>WHITENECK G, 2009, ARCH PHYS MED REHAB, V90, P0, DOI</u>      | 2009 | 6.6623   | 2016  | 2017 | 1    |
| <u>MASSOF RW, 2005, OPHTHAL EPIDEMIOL, V12, P103, DOI</u>        | 2005 | 6.6575   | 2007  | 2008 | 1    |
| FISCHER GH, 1995, RASCH MODELS, V0, P15                          | 1995 | 6.635    | 2000  | 2003 | 3    |
| **NATIONALRESEARCHCOUNCIL, 2012, FRAMEWORK K 12 SCI E            | 2012 | 6.6054   | 2017  | 2019 | 2    |
| <u>JAFARI P, 2012, HEALTH QUAL LIFE OUT, V10, P0, DOI</u>        | 2012 | 6.6054   | 2017  | 2019 | 2    |
| <u>LINACRE J, 2004, INTRO RASCH MEASUREMENT, V0, P258, DOI</u>   | 2004 | 6.601    | 2009  | 2011 | 2    |
| STELMACK JA, 2002, INVEST OPHTH VIS SCI, V43, P2859              | 2002 | 6.5492   | 2004  | 2008 | 4    |
| GELMAN A, 1995, BAYESIAN DATA ANAL                               | 1995 | 6.462    | 1999  | 2003 | 4    |
| LINACRE JM, 1997, USERS GUIDE BIGSTEPS                           | 1997 | 6.462    | 1999  | 2003 | 4    |
| TENNANT A, 1996, BRIT J RHEUMATOL, V35, P574                     | 1996 | 6.3264   | 1997  | 2004 | 7    |
| <u>MEIJER RR, 2001, APPL PSYCH MEAS, V25, P107, DOI</u>          | 2001 | 6.3091   | 2002  | 2005 | 3    |
| LINACRE JM, 2008, USERS GUIDE WINSTEPS                           | 2008 | 6.2735   | 2010  | 2011 | 1    |
| ANDRICH D, 2003, RUMM2020                                        | 2003 | 6.2712   | 2009  | 2010 | 1    |
| <u>CANO SJ, 2011, PATIENT PREFER ADHER, V5, P279, DOI</u>        | 2011 | 6.2095   | 2017  | 2019 | 2    |
| <u>BOONE WJ, 2006, SCI EDUC, V90, P253, DOI</u>                  | 2006 | 6.1882   | 2013  | 2014 | 1    |
| BROWN TA, 2006, CONFIRMATORY FACTOR                              | 2006 | 6.1882   | 2013  | 2014 | 1    |
| <u>GRIMBY G, 1996, ARCH PHYS MED REHAB, V77, P1109, DOI</u>      | 1996 | 6.1835   | 2000  | 2004 | 4    |
| WRIGHT BD, 1979, BEST TEST DESIGN                                | 1979 | 6.1724   | 1981  | 1986 | 5    |
| BOND TG, 2007, APPLYING RASCH MODEL                              | 2007 | 6.1505   | 2010  | 2012 | 2    |
| BAKER FB, 2004, ITEM RESPONSE THEORY                             | 2004 | 6.1367   | 2007  | 2012 | 5    |
| STREINER DL, 1995, HLTH MEASUREMENT SCA                          | 1995 | 6.0309   | 2000  | 2003 | 3    |
| <u>KANE MT, 2013, J EDUC MEAS, V50, P1, DOI</u>                  | 2013 | 6.004    | 2017  | 2019 | 2    |
| <u>DAVIS AM, 2003, J CLIN EPIDEMIOL, V56, P1076, DOI</u>         | 2003 | 5.8812   | 2008  | 2009 | 1    |
| <u>NORQUIST JM, 2004, MED CARE, V42, P125</u>                    | 2004 | 5.8812   | 2008  | 2009 | 1    |

| References (DCA)                                                | Year | Strength | Begin | End  | Span |
|-----------------------------------------------------------------|------|----------|-------|------|------|
| <u>FISHER WP, 1995, ARCH PHYS MED REHAB, V76, P113, DOI</u>     | 1995 | 5.8736   | 1999  | 2003 | 4    |
| <u>R CT, 2014, R LANG ENV STAT COMP</u>                         | 2014 | 5.8025   | 2015  | 2016 | 1    |
| <u>MASSOF RW, 2005, ARCH PHYS MED REHAB, V86, P954, DOI</u>     | 2005 | 5.7729   | 2007  | 2010 | 3    |
| <u>TURANO KA, 1999, INVEST OPHTH VIS SCI, V40, P865</u>         | 1999 | 5.7691   | 2001  | 2004 | 3    |
| <u>LUNZ ME, 1990, APPLIED MEASUREMENT, V3, P331, DOI</u>        | 1990 | 5.7633   | 1994  | 1998 | 4    |
| <u>GOTHWAL VK, 2010, J CATARACT REFR SURG, V36, P1181, DOI</u>  | 2010 | 5.7506   | 2011  | 2014 | 3    |
| <u>ROST J, 2004, LEHRBUCH TESTTHEORIE</u>                       | 2004 | 5.7023   | 2005  | 2006 | 1    |
| <u>GOTHWAL VK, 2009, J CATARACT REFR SURG, V35, P1509, DOI</u>  | 2009 | 5.7023   | 2010  | 2011 | 1    |
| <u>WOLF J, 2007, PAEDIATR RESPIR REV, V8, P204, DOI</u>         | 2007 | 5.7002   | 2009  | 2010 | 1    |
| <u>ANDRICH D, 2003, J APPL MEAS, V4, P205</u>                   | 2003 | 5.7002   | 2009  | 2010 | 1    |
| <u>PESUDOV S K, 2006, INVEST OPHTH VIS SCI, V47, P2789, DOI</u> | 2006 | 5.7002   | 2009  | 2010 | 1    |
| <u>WARE JE, 1992, MED CARE, V30, P473, DOI</u>                  | 1992 | 5.6441   | 1996  | 2000 | 4    |
| <u>ELHAN AH, 2008, BMC MUSCULOSKEL DIS, V9, P0, DOI</u>         | 2008 | 5.6248   | 2013  | 2014 | 1    |
| <u>EDELEN MO, 2007, QUAL LIFE RES, V16, P5, DOI</u>             | 2007 | 5.5645   | 2014  | 2015 | 1    |
| <u>ANDRICH D, 2012, APPL PSYCH MEAS, V36, P309, DOI</u>         | 2012 | 5.5645   | 2014  | 2015 | 1    |
| <u>FISCHER GH, 1974, EINFUHRUNG THEORIE P</u>                   | 1974 | 5.4969   | 1979  | 1981 | 2    |
| <u>WRIGHT BD, 1977, J EDUC MEAS, V14, P97, DOI</u>              | 1977 | 5.4969   | 1979  | 1981 | 2    |
| <u>RASCH G, 1980, PROBABILISTIC MODELS</u>                      | 1980 | 5.4943   | 1982  | 1988 | 6    |
| <u>KELDERMAN H, 1984, PSYCHOMETRIKA, V49, P223, DOI</u>         | 1984 | 5.4711   | 1988  | 1992 | 4    |
| <u>MCHORNEY CA, 2004, MED CARE, V42, P73, DOI</u>               | 2004 | 5.446    | 2005  | 2008 | 3    |
| <u>PATZ RJ, 1999, J EDUC BEHAV STAT, V24, P342, DOI</u>         | 1999 | 5.4262   | 2002  | 2007 | 5    |
| <u>KELDERMAN H, 1994, PSYCHOMETRIKA, V59, P149, DOI</u>         | 1994 | 5.4241   | 1997  | 2002 | 5    |
| <u>RYSER L, 1999, ARTHRIT CARE RES, V12, P331, DOI</u>          | 1999 | 5.394    | 2002  | 2004 | 2    |
| <u>CELLA D, 2000, MED CARE, V38, P66</u>                        | 2000 | 5.394    | 2002  | 2004 | 2    |
| <u>LI MNF, 1997, APPL PSYCH MEAS, V21, P215, DOI</u>            | 1997 | 5.3609   | 2000  | 2005 | 5    |
| <u>BEATON DE, 2000, SPINE, V25, P3186, DOI</u>                  | 2000 | 5.3329   | 2004  | 2006 | 2    |
| <u>TENNANT A, 2004, MED CARE S, V42, P137, DOI</u>              | 2004 | 5.2922   | 2008  | 2009 | 1    |
| <u>WRIGHT BD, 1996, STRUCT EQU MODELING, V3, P3, DOI</u>        | 1996 | 5.2854   | 1999  | 2003 | 4    |
| <u>TESIO L, 1997, PAIN, V69, P269, DOI</u>                      | 1997 | 5.2854   | 1999  | 2003 | 4    |
| <u>MARTHUR DL, 1991, ARCH PHYS MED REHAB, V72, P296</u>         | 1991 | 5.2428   | 1995  | 1997 | 2    |
| <u>FISHER WP, 1993, AM J OCCUP THER, V47, P331, DOI</u>         | 1993 | 5.2428   | 1995  | 1997 | 2    |
| <u>WU ML, 1998, ACER CONQUEST GEN IT</u>                        | 1998 | 5.1604   | 2002  | 2005 | 3    |
| <u>LINACRE JM, 2009, WINSTEPS RASCH MEASU</u>                   | 2009 | 5.1239   | 2010  | 2012 | 2    |
| <u>DEMARS C, 2010, ITEM RESPONSE THEORY</u>                     | 2010 | 5.1056   | 2014  | 2016 | 2    |
| <u>LINACRE J, 2011, WINSTEPS RASCH MEASU</u>                    | 2011 | 5.0809   | 2012  | 2016 | 4    |
| <u>MARGOLIS MK, 2002, PHARMACOECONOMICS, V20, P791, DOI</u>     | 2002 | 5.0355   | 2004  | 2008 | 4    |
| <u>ANDRICH D, 2010, RUMM2030</u>                                | 2010 | 5.0072   | 2014  | 2015 | 1    |
| <u>TENNANT A, 1996, CLIN REHABIL, V10, P301</u>                 | 1996 | 4.9464   | 2003  | 2004 | 1    |
| <u>WOLFE F, 2001, J RHEUMATOL, V28, P982</u>                    | 2001 | 4.9464   | 2003  | 2004 | 1    |
| <u>SVENSSON E, 2001, J REHABIL MED, V33, P47, DOI</u>           | 2001 | 4.9219   | 2004  | 2007 | 3    |
| <u>WHITE LJ, 2002, ARCH PHYS MED REHAB, V83, P822, DOI</u>      | 2002 | 4.8502   | 2004  | 2009 | 5    |
| <u>HAMBLETON RK, 2000, MED CARE, V38, P60</u>                   | 2000 | 4.8492   | 2002  | 2006 | 4    |
| <u>ROST J, 1999, PSYCHOL RUNDSCHE, V50, P140, DOI</u>           | 1999 | 4.824    | 2000  | 2005 | 5    |
| <u>GOTHWAL VK, 2010, INVEST OPHTH VIS SCI, V51, P694, DOI</u>   | 2010 | 4.8028   | 2012  | 2015 | 3    |
| <u>PRIETO L, 1998, J OUTCOME MEAS, V2, P285</u>                 | 1998 | 4.7939   | 2002  | 2004 | 2    |
| <u>ROST J, 1991, BRIT J MATH STAT PSY, V44, P75, DOI</u>        | 1991 | 4.7013   | 1998  | 1999 | 1    |
| <u>CONRAD KJ, 2004, MED CARE, V42, P1, DOI</u>                  | 2004 | 4.6108   | 2010  | 2012 | 2    |
| <u>BAKER FB, 1992, ITEM RESPONSE THEORY</u>                     | 1992 | 4.5973   | 1998  | 2000 | 2    |
| <u>GOTHWAL VK, 2009, CLIN EXP OPHTHALMOL, V37, P785, DOI</u>    | 2009 | 4.5943   | 2014  | 2016 | 2    |
| <u>BRADLOW ET, 1999, PSYCHOMETRIKA, V64, P153, DOI</u>          | 1999 | 4.5863   | 2002  | 2005 | 3    |
| <u>LINACRE JM, 1989, MANY FACETED RASCH M</u>                   | 1989 | 4.5769   | 1993  | 1996 | 3    |
| <u>MYFORD CM, 2003, J APPL MEAS, V4, P386</u>                   | 2003 | 4.5631   | 2006  | 2008 | 2    |
| <u>MASSOF RW, 2007, OPTOMETRY VISION SCI, V84, P763, DOI</u>    | 2007 | 4.541    | 2012  | 2014 | 2    |
| <u>ROSSEEL Y, 2012, J STAT SOFTW, V48, P1</u>                   | 2012 | 4.5139   | 2017  | 2019 | 2    |



| References (DCA)                                             | Year | Strength | Begin | End  | Span |
|--------------------------------------------------------------|------|----------|-------|------|------|
| <u>ADAMS RJ, 2012, EDUC PSYCHOL MEAS, V72, P547, DOI</u>     | 2012 | 4.5139   | 2017  | 2019 | 2    |
| <u>ZICKAR MJ, 1996, APPL PSYCH MEAS, V20, P71, DOI</u>       | 1996 | 4.4624   | 2000  | 2002 | 2    |
| MCDOWELL I, 1996, MEASURING HLTH GUIDE                       | 1996 | 4.4624   | 2000  | 2002 | 2    |
| <u>RIJMEN F, 2003, PSYCHOL METHODS, V8, P185, DOI</u>        | 2003 | 4.4337   | 2005  | 2006 | 1    |
| FOX CM, 1998, J COUNS PSYCHOL, V45, P30                      | 1998 | 4.4063   | 2001  | 2005 | 4    |
| <u>HALEY SM, 2004, MED CARE, V42, P49, DOI</u>               | 2004 | 4.3885   | 2004  | 2005 | 1    |
| TENNANT A, 2007, RASCH MEASUREMENT T, V24, P1082             | 2007 | 4.3655   | 2012  | 2015 | 3    |
| <u>ADAMS RJ, 1997, J EDUC BEHAV STAT, V22, P47, DOI</u>      | 1997 | 4.3275   | 2003  | 2004 | 1    |
| <u>MASSOF RW, 1998, OPTOMETRY VISION SCI, V75, P349, DOI</u> | 1998 | 4.3237   | 2001  | 2003 | 2    |
| <u>REVICKI DA, 1997, QUAL LIFE RES, V6, P595, DOI</u>        | 1997 | 4.2874   | 2000  | 2005 | 5    |
| <u>VELOZO CA, 1995, ARCH PHYS MED REHAB, V76, P705, DOI</u>  | 1995 | 4.2197   | 2000  | 2003 | 3    |
| KLAUER KC, 1995, RASCH MODELS, V0, P97                       | 1995 | 4.2197   | 2000  | 2003 | 3    |
| LINACRE JM, 2014, USERS GUIDE WINSTEPS                       | 2014 | 4.1469   | 2016  | 2019 | 3    |
| SMITH E, 2000, J APPL MEAS, V1, P303                         | 2000 | 4.1466   | 2004  | 2006 | 2    |
| ANDERSEN EB, 1973, CONDITIONAL INFERENC                      | 1973 | 4.1214   | 1979  | 1981 | 2    |

### Appendix 3

**Journal co-citation analysis (JCA). This analysis also includes the title of influential books.**

| Cited Journals (JCA) | Strength | Begin | End  | Span |
|----------------------|----------|-------|------|------|
| PSYCHOMETRIKA        | 68.4709  | 1976  | 1999 | 23   |
| J EDUC MEAS          | 26.9571  | 1977  | 2000 | 23   |
| EDUC PSYCHOL MEAS    | 4.3176   | 1977  | 1981 | 4    |
| BRIT J MATH STAT PSY | 21.2794  | 1978  | 2001 | 23   |
| CONDITIONAL INFERENC | 4.137    | 1979  | 1981 | 2    |
| EINFUHRUNG THEORIE P | 5.5169   | 1979  | 1981 | 2    |
| REV EDUC RES         | 4.3638   | 1980  | 1999 | 19   |
| APPLIED PSYCHOL MEAS | 6.7869   | 1980  | 1992 | 12   |
| ANN STAT             | 4.4518   | 1981  | 1998 | 17   |
| BEST TEST DESIGN     | 6.1911   | 1981  | 1986 | 5    |
| PSYCHOL BULL         | 13.9553  | 1981  | 2003 | 22   |
| Z EXP ANGEW PSYCHOL  | 4.1393   | 1981  | 1983 | 2    |
| BIOMETRICS           | 9.6156   | 1982  | 2006 | 24   |
| PROBABILISTIC MODELS | 5.5096   | 1982  | 1988 | 6    |
| APPL PSYCH MEAS      | 36.9212  | 1983  | 2000 | 17   |
| ANN M AM ED RES ASS  | 10.6826  | 1986  | 2003 | 17   |
| J EDUC STAT          | 15.6437  | 1990  | 2001 | 11   |
| RASCH MODELS MEASURE | 16.789   | 1991  | 1996 | 5    |
| LATENT TRAIT LATENT  | 6.7044   | 1991  | 1995 | 4    |
| J AM STAT ASSOC      | 25.1502  | 1991  | 2007 | 16   |
| BIOMETRIKA           | 7.0563   | 1992  | 2002 | 10   |
| FACETS COMPUTER PROG | 6.4984   | 1992  | 1996 | 4    |
| APPLIED MEASUREMENT  | 16.8069  | 1992  | 2000 | 8    |
| ED MEASUREMENT       | 9.9681   | 1992  | 1996 | 4    |
| APR ANN M AM ED RES  | 4.7643   | 1992  | 1994 | 2    |
| J ROY STAT SOC B MET | 4.3683   | 1993  | 2000 | 7    |
| MANY FACETED RASCH M | 7.4913   | 1993  | 2000 | 7    |

|                       |         |      |      |    |
|-----------------------|---------|------|------|----|
| AM J OCCUP THER       | 14.021  | 1993 | 2002 | 9  |
| SOCIOL METHODOL       | 6.8603  | 1993 | 2003 | 10 |
| ED MEASUREMENT ISSUE  | 7.7417  | 1994 | 2002 | 8  |
| OBJECTIVE MEASUREMENT | 22.5143 | 1994 | 2004 | 10 |
| PHYS MED REH CLIN N   | 4.441   | 1995 | 2000 | 5  |
| FUNDAMENTALS ITEM RE  | 10.3875 | 1995 | 1999 | 4  |
| SCAND J REHABIL MED   | 19.9581 | 1995 | 2004 | 9  |
| AM J PHYS MED REHAB   | 20.4641 | 1995 | 2009 | 14 |
| PSYCHOL REV           | 4.6227  | 1995 | 1998 | 3  |
| USERS GUIDE BIGSTEPS  | 24.4569 | 1995 | 2005 | 10 |
| METHODIKA             | 4.9443  | 1995 | 2001 | 6  |
| RES Q EXERCISE SPORT  | 4.3735  | 1996 | 2001 | 5  |
| RASCH MODELS          | 33.6824 | 1996 | 2003 | 7  |
| BIGSTEPS              | 6.4137  | 1996 | 2000 | 4  |
| J AM SOC INFORM SCI   | 4.4885  | 1996 | 2000 | 4  |
| ACTA NEUROL SCAND     | 5.199   | 1997 | 2007 | 10 |
| AM J PUBLIC HEALTH    | 6.1733  | 1997 | 2002 | 5  |
| QUALITY LIFE PHARMAC  | 8.55    | 1997 | 2004 | 7  |
| BRIT J RHEUMATOL      | 14.8325 | 1997 | 2004 | 7  |
| ANN INTERN MED        | 13.6894 | 1997 | 2004 | 7  |
| PAIN                  | 10.6173 | 1997 | 2009 | 12 |
| APPL LATENT TRAIT LA  | 15.575  | 1998 | 2005 | 7  |
| RASCH MODELS FDN REC  | 23.1257 | 1998 | 2003 | 5  |
| J OUTCOME MEAS        | 74.2638 | 1998 | 2007 | 9  |
| COMPUTERIZED ADAPTIV  | 10.0382 | 1998 | 2006 | 8  |
| CONQUEST GEN ITEM RE  | 5.0698  | 1999 | 2005 | 6  |
| DIAGNOSTICA           | 11.262  | 1999 | 2006 | 7  |
| LEHRBUCH TESTTHEORIE  | 7.504   | 1999 | 2006 | 7  |
| J PERS SOC PSYCHOL    | 9.114   | 1999 | 2006 | 7  |
| BAYESIAN DATA ANAL    | 6.767   | 1999 | 2003 | 4  |
| BRIT J EDUC PSYCHOL   | 4.4368  | 1999 | 2002 | 3  |
| STRUCT EQU MODELING   | 15.6822 | 1999 | 2007 | 8  |
| MEASURING HLTH GUIDE  | 4.5182  | 2000 | 2002 | 2  |
| J GERONTOL B-PSYCHOL  | 7.5222  | 2000 | 2003 | 3  |
| J GERONTOL A-BIOL     | 8.3084  | 2000 | 2008 | 8  |
| ARTHRI CARE RES       | 8.6519  | 2000 | 2004 | 4  |
| PSYCHOL RUNDSCH       | 4.5182  | 2000 | 2002 | 2  |
| PHARMACOECONOMICS     | 5.9805  | 2000 | 2004 | 4  |
| PSYCHOMETRIC THEORY   | 5.164   | 2000 | 2002 | 2  |
| ARTHRITIS RHEUM       | 9.233   | 2000 | 2008 | 8  |
| METHODS PSYCHOL RES   | 5.3821  | 2000 | 2004 | 4  |
| J APPL PSYCHOL        | 4.4867  | 2001 | 2003 | 2  |
| ESSAYS ITEM RESPONSE  | 5.7695  | 2001 | 2003 | 2  |
| J EDUC BEHAV STAT     | 14.839  | 2001 | 2007 | 6  |
| J HEAD TRAUMA REHAB   | 6.9399  | 2002 | 2006 | 4  |
| ADV MEASUREMENT ED R  | 6.9399  | 2002 | 2006 | 4  |

|                           |         |      |      |   |
|---------------------------|---------|------|------|---|
| ED RES METHODOLOGY M      | 4.2394  | 2002 | 2005 | 3 |
| MULTIVAR BEHAV RES        | 7.5412  | 2002 | 2007 | 5 |
| STROKE                    | 13.1618 | 2002 | 2009 | 7 |
| CLIN REHABIL              | 13.52   | 2002 | 2011 | 9 |
| J RHEUMATOL               | 13.9292 | 2002 | 2010 | 8 |
| ITEM RESPONSE THEORY      | 40.6607 | 2003 | 2008 | 5 |
| BRIT MED J                | 11.2386 | 2003 | 2010 | 7 |
| RHEUMATOLOGY              | 14.2947 | 2003 | 2010 | 7 |
| PSYCHOL METHODS           | 19.5114 | 2003 | 2007 | 4 |
| APPLYING RASCH MODEL      | 32.4572 | 2003 | 2009 | 6 |
| WINSTEPS RASCH ANAL       | 4.9837  | 2003 | 2005 | 2 |
| SURV OPHTHALMOL           | 7.9516  | 2004 | 2007 | 3 |
| ARCH OPHTHALMOL-CHIC      | 19.2096 | 2004 | 2013 | 9 |
| VISION RES                | 26.6855 | 2004 | 2010 | 6 |
| INT CLASS FUNCT DIS       | 29.497  | 2004 | 2009 | 5 |
| MED CARE                  | 59.4932 | 2004 | 2012 | 8 |
| STAT MED                  | 16.6398 | 2004 | 2008 | 4 |
| SPINE                     | 17.6462 | 2004 | 2009 | 5 |
| PERS INDIV DIFFER         | 6.3753  | 2005 | 2012 | 7 |
| J APPL MEAS               | 62.4672 | 2005 | 2010 | 5 |
| J NEUROL NEUROSUR PS      | 9.9743  | 2006 | 2014 | 8 |
| INTRO RASCH MEASUREM      | 44.6339 | 2006 | 2012 | 6 |
| OPHTHAL EPIDEMIOL         | 14.6407 | 2007 | 2013 | 6 |
| ANN RHEUM DIS             | 18.5242 | 2007 | 2012 | 5 |
| EXPLANATORY ITEM RES      | 9.0662  | 2007 | 2011 | 4 |
| HEALTH QUAL LIFE OUTCOMES | 23.0979 | 2007 | 2012 | 5 |
| J AM GERIATR SOC          | 20.6708 | 2007 | 2011 | 4 |
| OPHTHAL PHYSL OPT         | 10.5338 | 2007 | 2010 | 3 |
| RUMM 2020                 | 14.5555 | 2007 | 2010 | 3 |
| BMC OPHTHALMOL            | 14.8401 | 2008 | 2011 | 3 |
| RASCH MEAS T              | 21.0534 | 2009 | 2014 | 5 |
| ARTHRIT RHEUM-ARTHR       | 80.6204 | 2009 | 2015 | 6 |
| REHABIL PSYCHOL           | 20.2173 | 2009 | 2013 | 4 |
| BRIT J CLIN PSYCHOL       | 49.9896 | 2009 | 2015 | 6 |
| APPL MEAS EDUC            | 7.073   | 2009 | 2010 | 1 |
| BRAIN INJURY              | 19.4561 | 2009 | 2012 | 3 |
| DEV MED CHILD NEUROL      | 7.8956  | 2009 | 2012 | 3 |
| NEUROLOGY                 | 12.9825 | 2010 | 2013 | 3 |
| BRIT J OPHTHALMOL         | 7.197   | 2010 | 2013 | 3 |
| CONSTRUCTING MEASURE      | 21.6576 | 2010 | 2013 | 3 |
| INT J GERIATR PSYCH       | 10.6283 | 2010 | 2012 | 2 |
| J CATARACT REFR SURG      | 12.5145 | 2010 | 2016 | 6 |
| STAT SOC BEHAV SC         | 13.8797 | 2011 | 2012 | 1 |
| BMC MED RES METHODOL      | 22.1942 | 2012 | 2016 | 4 |
| HEALTH TECHNOL ASSES      | 31.3782 | 2012 | 2017 | 5 |
| LANCET NEUROL             | 22.6765 | 2012 | 2015 | 3 |

|                                                                          |         |      |      |   |
|--------------------------------------------------------------------------|---------|------|------|---|
| INT J NURS STUD                                                          | 32.0875 | 2012 | 2017 | 5 |
| NEW ENGL J MED                                                           | 16.2801 | 2013 | 2014 | 1 |
| SOC SCI MED                                                              | 11.7992 | 2013 | 2014 | 1 |
| PSYCHO-ONCOLOGY                                                          | 14.9032 | 2013 | 2014 | 1 |
| AM J OPHTHALMOL                                                          | 5.1204  | 2013 | 2014 | 1 |
| BMC MUSCULOSKEL DIS                                                      | 17.5562 | 2013 | 2017 | 4 |
| HLTH MEASUREMENT SCA                                                     | 15.7046 | 2013 | 2015 | 2 |
| J AFFECT DISORDERS                                                       | 17.072  | 2014 | 2017 | 3 |
| PHYS THER                                                                | 8.7087  | 2014 | 2016 | 2 |
| R LANG ENV STAT COMP                                                     | 32.0218 | 2014 | 2019 | 5 |
| PLOS ONE                                                                 | 83.7516 | 2015 | 2019 | 4 |
| EXPERT REV PHARM OUT                                                     | 9.4094  | 2015 | 2016 | 1 |
| J PSYCHOSOM RES                                                          | 9.888   | 2015 | 2017 | 2 |
| BMC PUBLIC HEALTH                                                        | 23.8413 | 2015 | 2019 | 4 |
| JAMA-J AM MED ASSOC                                                      | 10.0844 | 2015 | 2017 | 2 |
| BMC HEALTH SERV RES                                                      | 11.4836 | 2015 | 2019 | 4 |
| J RES SCI TEACH                                                          | 21.0856 | 2016 | 2019 | 3 |
| HEALTH QUAL LIFE OUT                                                     | 43.4422 | 2016 | 2019 | 3 |
| LANG TEST                                                                | 26.6721 | 2016 | 2019 | 3 |
| LANCET                                                                   | 15.578  | 2016 | 2019 | 3 |
| OPHTHALMOLOGY                                                            | 6.5422  | 2016 | 2017 | 1 |
| SCI EDUC                                                                 | 17.9859 | 2016 | 2019 | 3 |
| THESIS                                                                   | 53.7951 | 2016 | 2019 | 3 |
| INT J SCI EDUC                                                           | 20.1118 | 2016 | 2019 | 3 |
| RASCH ANAL HUMAN SCI                                                     | 31.7571 | 2016 | 2019 | 3 |
| INVARIANT MEASUREMENT: USING RASCH MODELS<br>IN THE SOCIAL<br>ASSESSMENT | 28.0581 | 2016 | 2019 | 3 |
| PSYCHOL ASSESSMENT                                                       | 26.7557 | 2016 | 2019 | 3 |
| J STAT SOFTW                                                             | 5.8113  | 2017 | 2019 | 2 |
| FRONT PSYCHOL                                                            | 12.7044 | 2017 | 2019 | 2 |
| PROCD SOC BEHV                                                           | 24.7431 | 2017 | 2019 | 2 |
| RASCH MODELS HLTH                                                        | 21.5745 | 2017 | 2019 | 2 |
|                                                                          | 24.2148 | 2017 | 2019 | 2 |
